# Supplementary material for: Spatiotemporal Coordination of Rac1 and Cdc42 at the Whole Cell Level during Cell Ruffling
Source: Cells. 2023 Jun 15;12(12):1638. doi: 10.3390/cells12121638 (PMC10297213; doi:10.3390/cells12121638)
Supplement: Supplementary file 1 [file cells-12-01638-s001.zip]

Archive with 4 entries (4 files):
- Supplemental Information.pdf
- Supplemental Video 1.mp4
- Supplemental Video 2.mp4
- Supplemental Video 3.mp4
